# Supplementary material for: Role of Green Macroalgae Enteromorpha Prolifera Polyphenols in the Modulation of Gene Expression and Intestinal Microflora Profiles in Type 2 Diabetic Mice
Source: PubMed Central journal article supplement (PMC6337142; doi:10.3390/ijms20010025), 2018-12-21
Supplement: ijms-20-00025-s001.pdf [file ijms-20-00025-s001.pdf]

## Supplementary Materials

# Role of green macroalgae *Enteromorpha prolifera* polyphenols in the modulation of gene expression and intestinal microflora profiles in type 2 diabetic mice

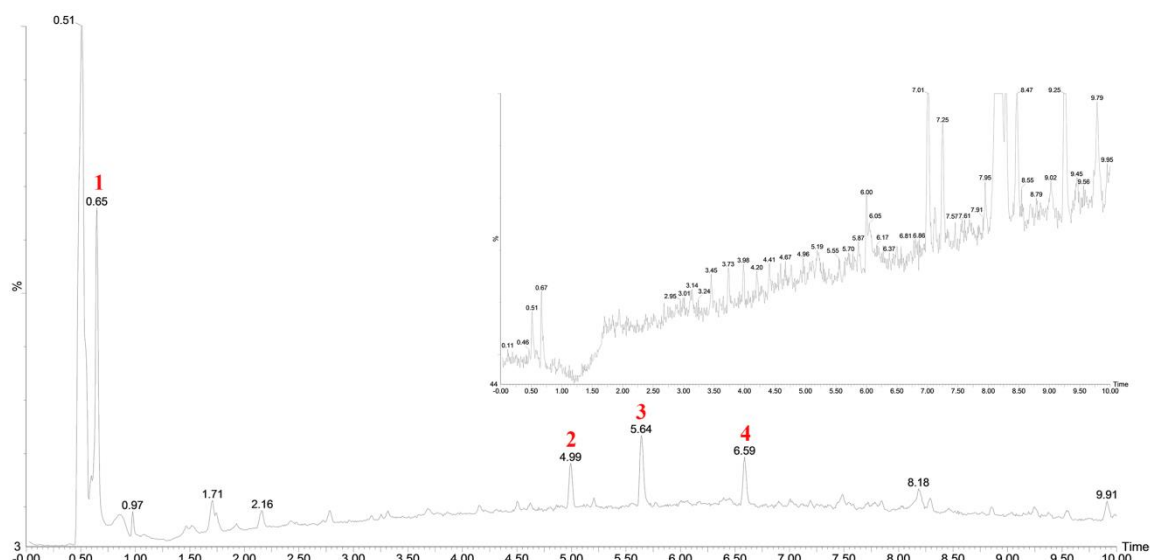

**Figure S1.** Chromatographic peaks of EPE3k in UPLC. The graphic in the top right was presented the spectrums of the blank.

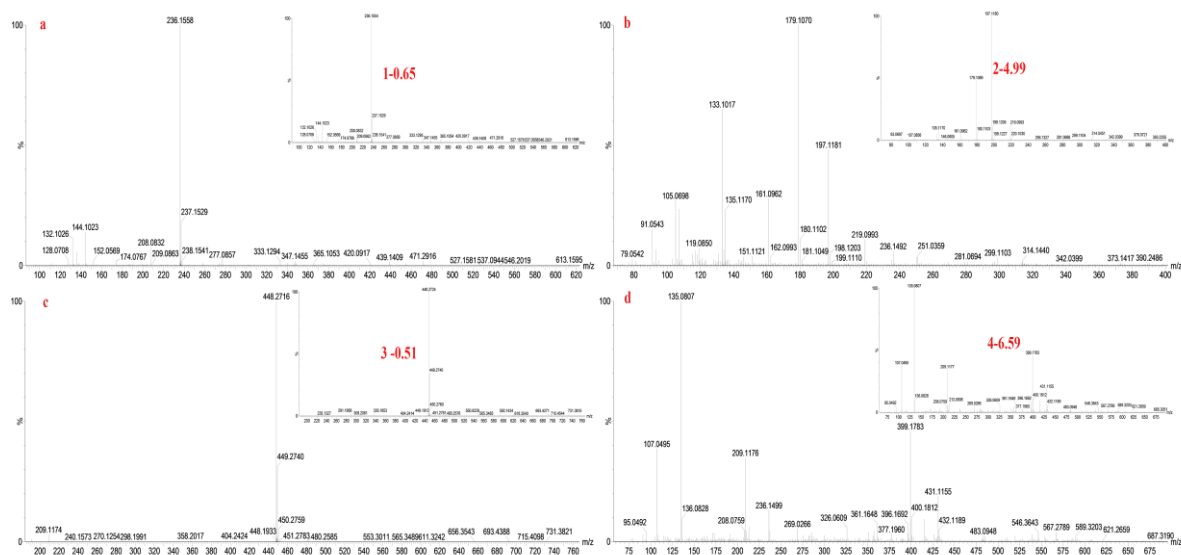

**Figure S2.** Representative chromatographs of EPE3k with UPLC-Q-TOF-MS/MS.

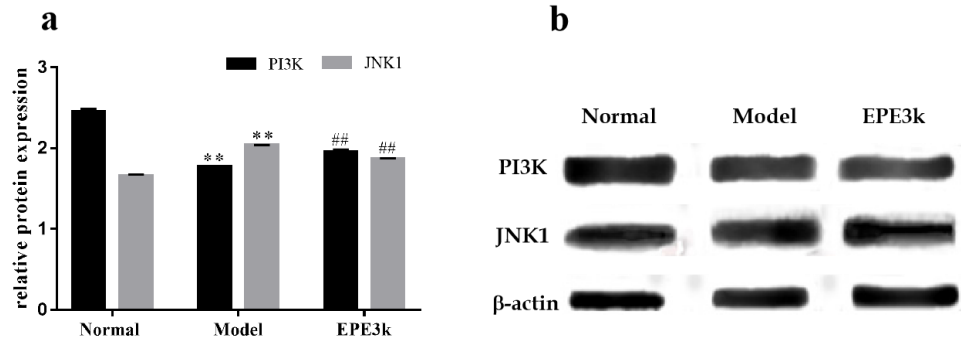

**Figure S3.** Effects of EPE3k treatment on the protein expression levels of PI3K and JNK1 (a), and western blot analysis (b). Signals were normalized with those of  $\beta$ -actin. The values were expressed as mean  $\pm$  SD ( $n \geq 3$ ). ##  $p < 0.01$ , compared with model group; \*\*  $p < 0.01$ , compared with normal group.
